# Supplementary material
Source: Springer Nature journal article supplement (https://www.springerprofessional.de/resource/supplementary/13638_2014_895_MOESM7_ESM.pdf/11899152)

# Signaling Overhead vs. Vehicle Density

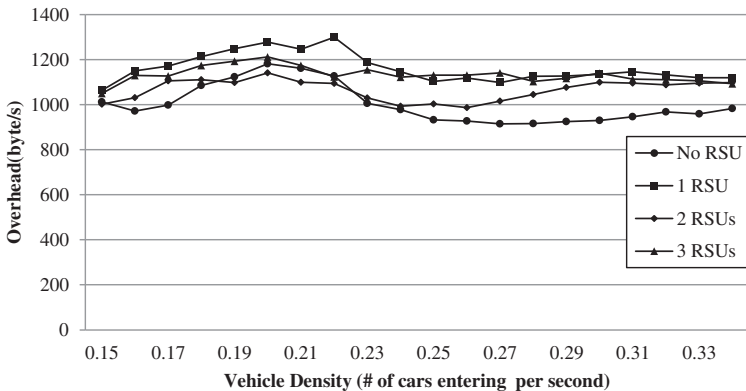

(a)

# Transmission Latency vs. Vehicle Density

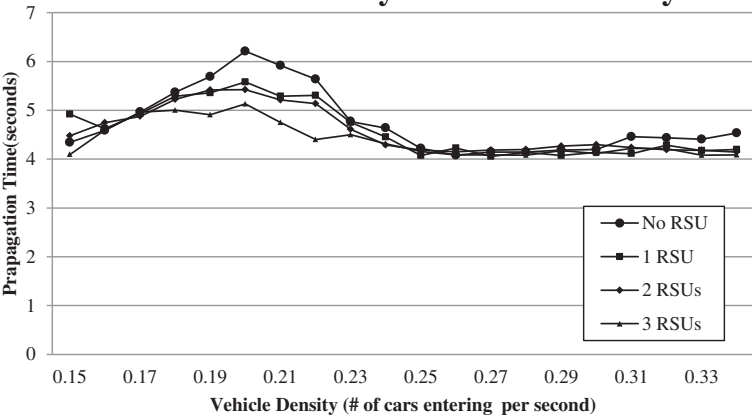

(b)

Supplement: MOESM7 [file 11899152]
